# Supplementary material for: Dataset variability and carbonate concentration influence the performance of local visible-near infrared spectral models
Source: Copernicus journal article supplement (doi:10.5194/egusphere-2023-1087), 2023-06-30
Supplement: Supplementary file 1 [file egusphere-2023-1087-supplement.pdf]

# Supplementary material

5 **Table S1: Data distribution statistics for each of the six fields (A-F) and the combined data set (All). Concentrations in soil organic C (SOC), Total N and Total C are indicated in g kg<sup>-1</sup> and permanganate oxidizable C (POXC) in mg kg<sup>-1</sup>.**

| Field | Property | n   | Mean | SD   | CV [%] | Min  | 1 Quant. | Median | 3 Quant. | Max  | Skew  | Kurtosis |
|-------|----------|-----|------|------|--------|------|----------|--------|----------|------|-------|----------|
| A     | SOC      | 70  | 22.4 | 3.7  | 16.5   | 15.0 | 19.7     | 22.0   | 24.9     | 32.1 | 0.28  | -0.32    |
|       | POXC     |     | 789  | 108  | 13.7   | 524  | 731      | 782    | 863      | 1047 | -0.24 | 0.01     |
|       | Total N  |     | 2.25 | 0.29 | 13.1   | 1.66 | 2.06     | 2.24   | 2.42     | 2.97 | 0.36  | -0.27    |
|       | Total C  |     | 29.5 | 9.0  | 30.6   | 16.4 | 21.8     | 27.3   | 34.9     | 50.0 | 0.67  | -0.78    |
|       | pH       |     | 7.21 | 0.13 | 1.8    | 6.91 | 7.13     | 7.22   | 7.29     | 7.50 | -0.04 | -0.34    |
| B     | SOC      | 70  | 18.7 | 4.3  | 22.7   | 11.7 | 15.6     | 18.4   | 21.1     | 30.6 | 0.65  | -0.07    |
|       | POXC     |     | 720  | 115  | 15.9   | 441  | 634      | 728    | 794      | 1059 | 0.10  | -0.03    |
|       | Total N  |     | 2.03 | 0.37 | 18.2   | 1.46 | 1.80     | 1.96   | 2.20     | 3.05 | 0.84  | 0.23     |
|       | Total C  |     | 20.1 | 4.9  | 24.3   | 12.5 | 16.5     | 19.4   | 22.8     | 33.7 | 0.68  | -0.13    |
|       | pH       |     | 6.63 | 0.47 | 7.1    | 5.72 | 6.15     | 6.84   | 7.01     | 7.28 | -0.41 | -1.32    |
| C     | SOC      | 70  | 28.8 | 3.2  | 11.1   | 23.2 | 26.0     | 28.5   | 31.5     | 28.5 | 0.19  | -1.10    |
|       | POXC     |     | 890  | 101  | 11.3   | 644  | 830      | 899    | 967      | 1076 | -0.35 | -0.54    |
|       | Total N  |     | 2.84 | 0.27 | 9.7    | 2.23 | 2.66     | 2.86   | 3.03     | 3.42 | -0.16 | -0.42    |
|       | Total C  |     | 32.6 | 5.2  | 16.1   | 24.7 | 28.6     | 32.6   | 35.9     | 46.5 | 0.75  | -0.08    |
|       | pH       |     | 7.19 | 0.16 | 2.2    | 6.64 | 7.14     | 7.24   | 7.29     | 7.4  | -1.74 | 3.40     |
| D     | SOC      | 70  | 20.7 | 4.9  | 23.6   | 12.0 | 17.9     | 20.2   | 24.5     | 30.7 | 0.15  | -0.84    |
|       | POXC     |     | 799  | 154  | 19.2   | 424  | 709      | 772    | 953      | 1034 | -0.20 | -0.90    |
|       | Total N  |     | 2.38 | 0.47 | 19.6   | 1.40 | 2.16     | 2.35   | 2.73     | 3.36 | 0.02  | -0.65    |
|       | Total C  |     | 24.2 | 6.2  | 25.8   | 13.0 | 19.9     | 24.4   | 29.2     | 38.2 | 0.01  | -0.89    |
|       | pH       |     | 6.80 | 0.59 | 8.7    | 5.52 | 6.26     | 7.11   | 7.30     | 7.49 | -0.58 | -1.14    |
| E     | SOC      | 53  | 15.2 | 2.9  | 15.1   | 9.8  | 12.4     | 15.1   | 17.5     | 21.3 | 0.04  | -1.08    |
|       | POXC     |     | 635  | 118  | 18.5   | 396  | 552      | 655    | 719      | 911  | -0.29 | -0.68    |
|       | Total N  |     | 1.77 | 0.31 | 17.3   | 1.16 | 1.47     | 1.79   | 2.03     | 2.30 | -0.22 | -1.21    |
|       | Total C  |     | 21.3 | 9.4  | 44.0   | 10.2 | 12.7     | 18.4   | 29.1     | 39.7 | 0.55  | -1.20    |
|       | pH       |     | 6.77 | 0.68 | 10.1   | 5.48 | 6.15     | 6.99   | 7.37     | 7.47 | -0.55 | -1.29    |
| F     | SOC      | 53  | 28.6 | 2.7  | 9.6    | 22.4 | 26.8     | 29.1   | 30.7     | 33.3 | -0.51 | -0.63    |
|       | POXC     |     | 661  | 72   | 11.0   | 479  | 615      | 664    | 707      | 790  | -0.18 | -0.61    |
|       | Total N  |     | 1.92 | 0.22 | 11.5   | 1.44 | 1.73     | 1.97   | 2.09     | 2.30 | -0.29 | -1.05    |
|       | Total C  |     | 50.3 | 2.4  | 4.8    | 45.0 | 48.3     | 50.5   | 52.3     | 54.0 | -0.47 | -0.85    |
|       | pH       |     | 7.49 | 0.04 | 0.5    | 7.38 | 7.47     | 7.50   | 7.53     | 7.56 | -0.68 | 0.15     |
| All   | SOC      | 386 | 22.4 | 6.1  | 27.1   | 9.8  | 17.7     | 22.4   | 27.3     | 35.2 | 0.00  | -1.02    |
|       | POXC     |     | 758  | 142  | 18.8   | 396  | 661      | 752    | 861      | 1076 | 0.01  | -0.50    |
|       | Total N  |     | 2.23 | 0.48 | 21.6   | 1.16 | 1.88     | 2.17   | 2.60     | 3.42 | 0.32  | -0.62    |
|       | Total C  |     | 29.1 | 11.6 | 39.9   | 10.2 | 20.0     | 27.5   | 35.5     | 54.0 | 0.57  | -0.64    |
|       | pH       |     | 7.00 | 0.51 | 7.3    | 5.48 | 6.88     | 7.20   | 7.35     | 7.56 | -1.30 | 0.60     |

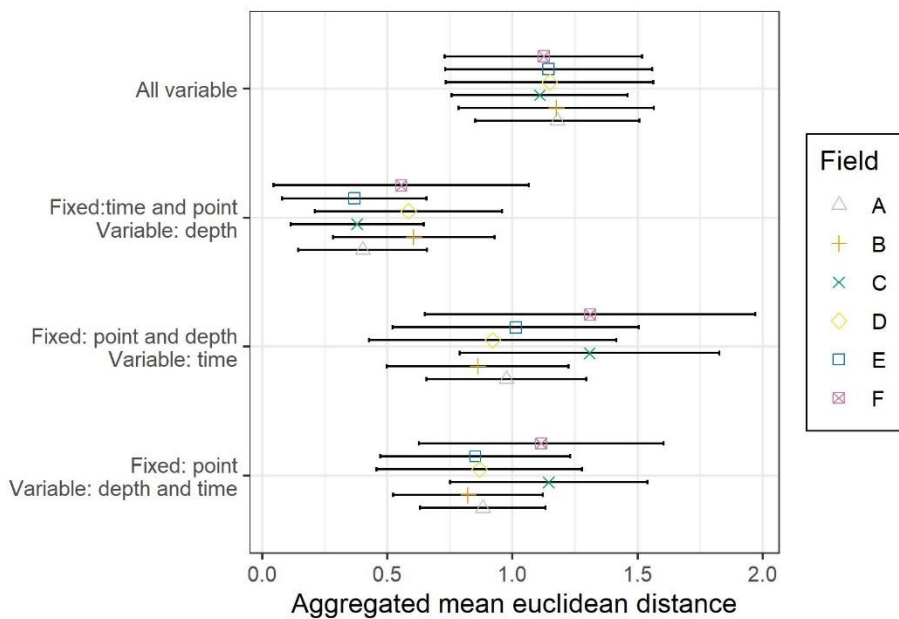

10 **Figure S1: Aggregated mean Euclidean distance of raw reflectance spectra per field between all samples (all variable), between samples at same time and point but different depths (fixed: time and point, variable: depth), between samples at same point and depth but different sampling times (fixed: point and depth, variable. Time) and between samples at the same point but different depth and sampling times (fixed: point, variable: depth and time)**

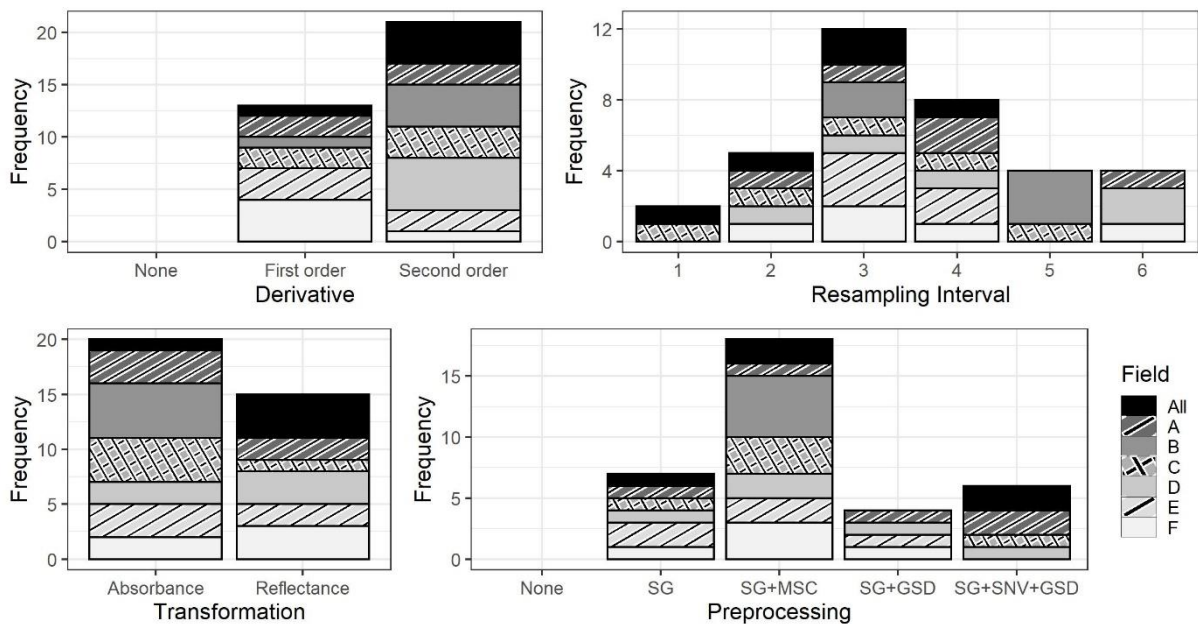

15

**Figure S2: Frequency of applied pre-processing steps to obtain the best model for SOC, total C, total N, POXC and pH for datasets of the six fields and a combined general (All) dataset. Window widths from 5 to 51 were tested. SG = Savitzky-Golay filter (m =**

order of derivative,  $w$  = window width), SNV = standard normal variate, GSD = gap segment derivative ( $m$  = derivative,  $w$  = window width,  $s$  = segment size), MSC = multiplicative scatter correction

20
